# Supplementary material for: The Role of NCS1 in Immunotherapy and Prognosis of Human Cancer
Source: MDPI journal article supplement (doi:10.3390/biomedicines11102765), 2023-10-12
Supplement: s1 [file s1]

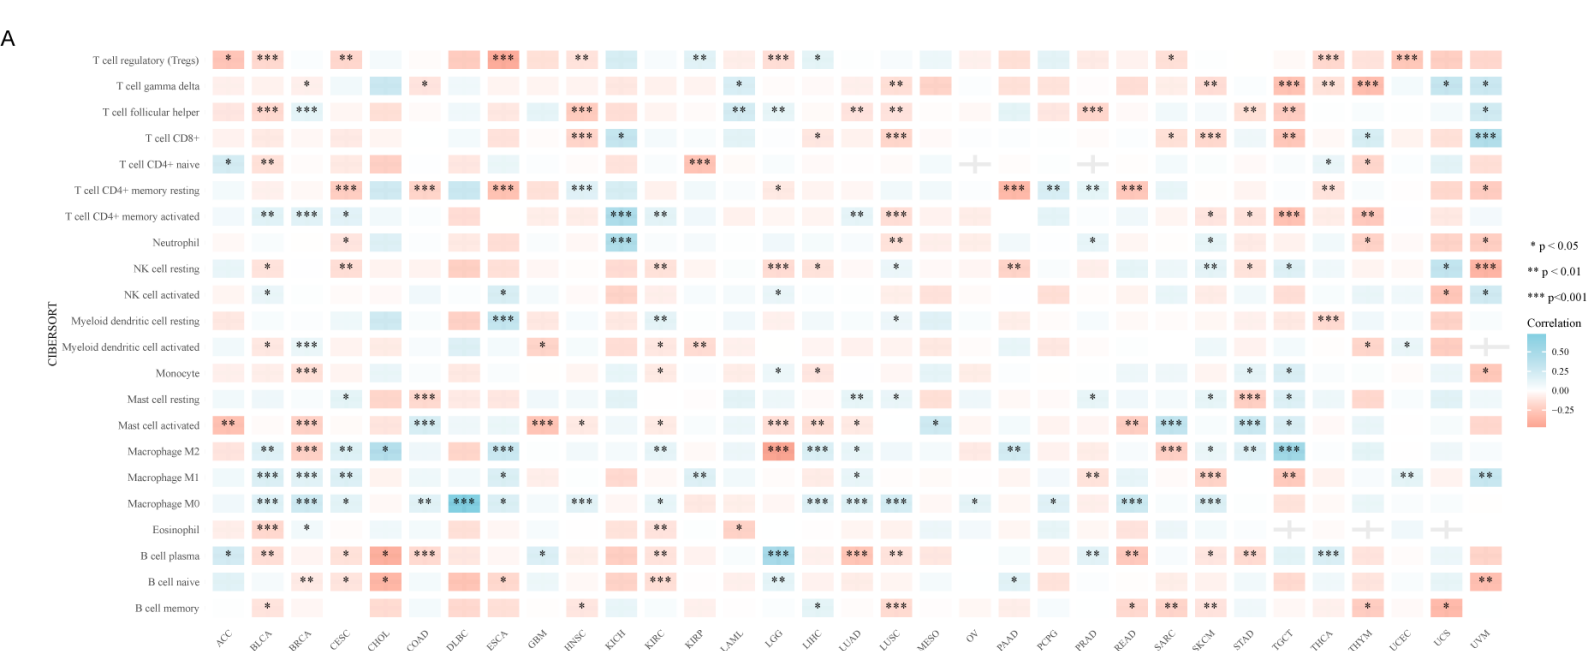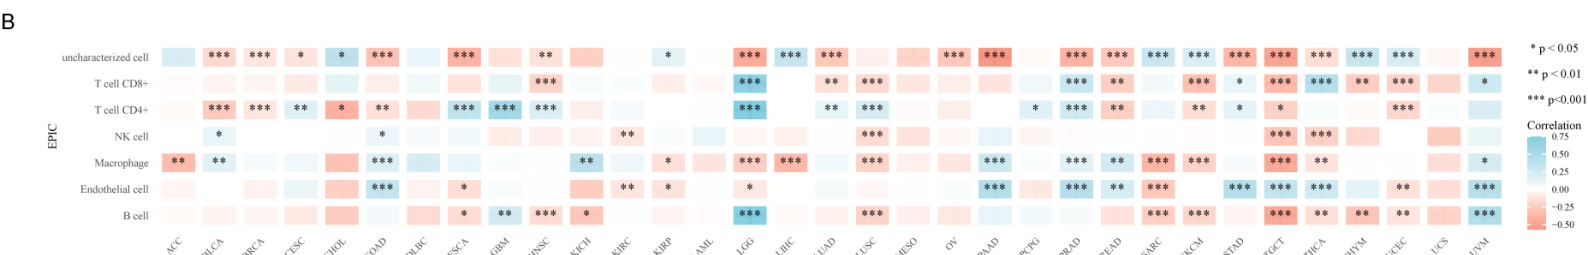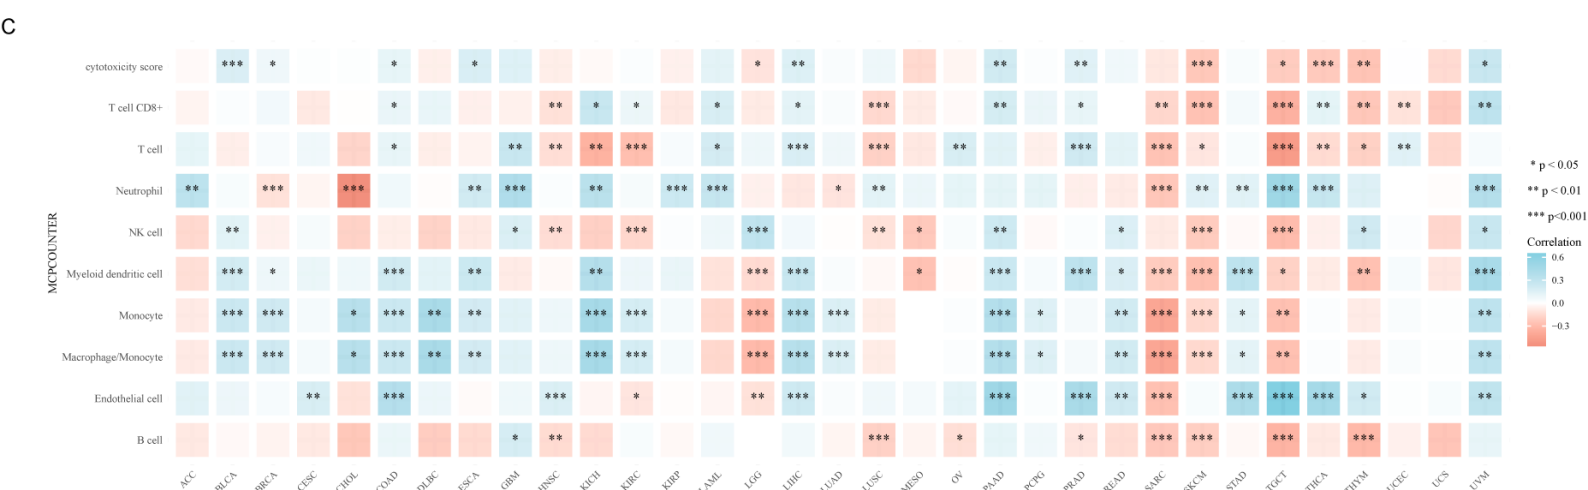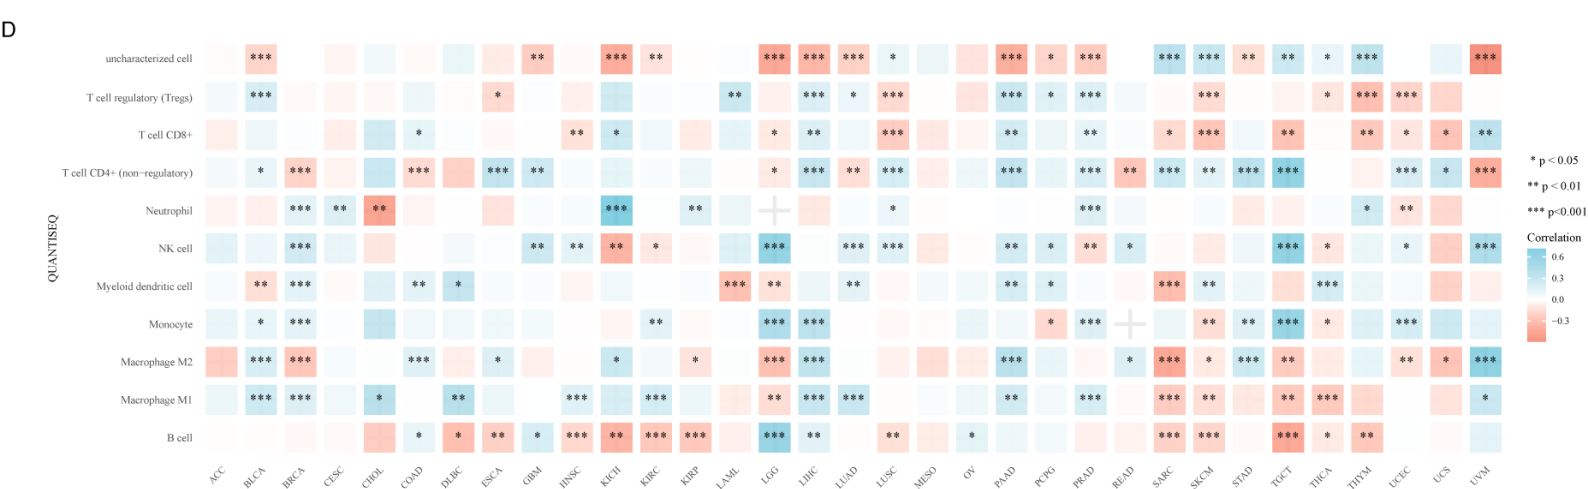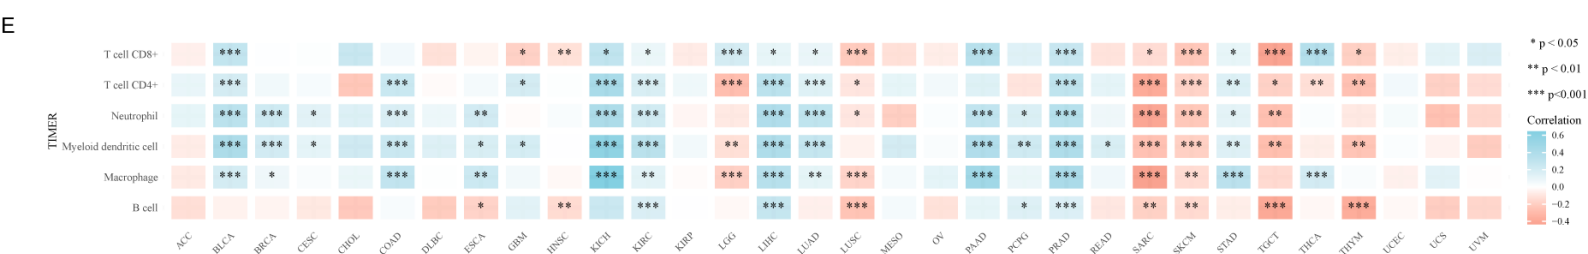

A

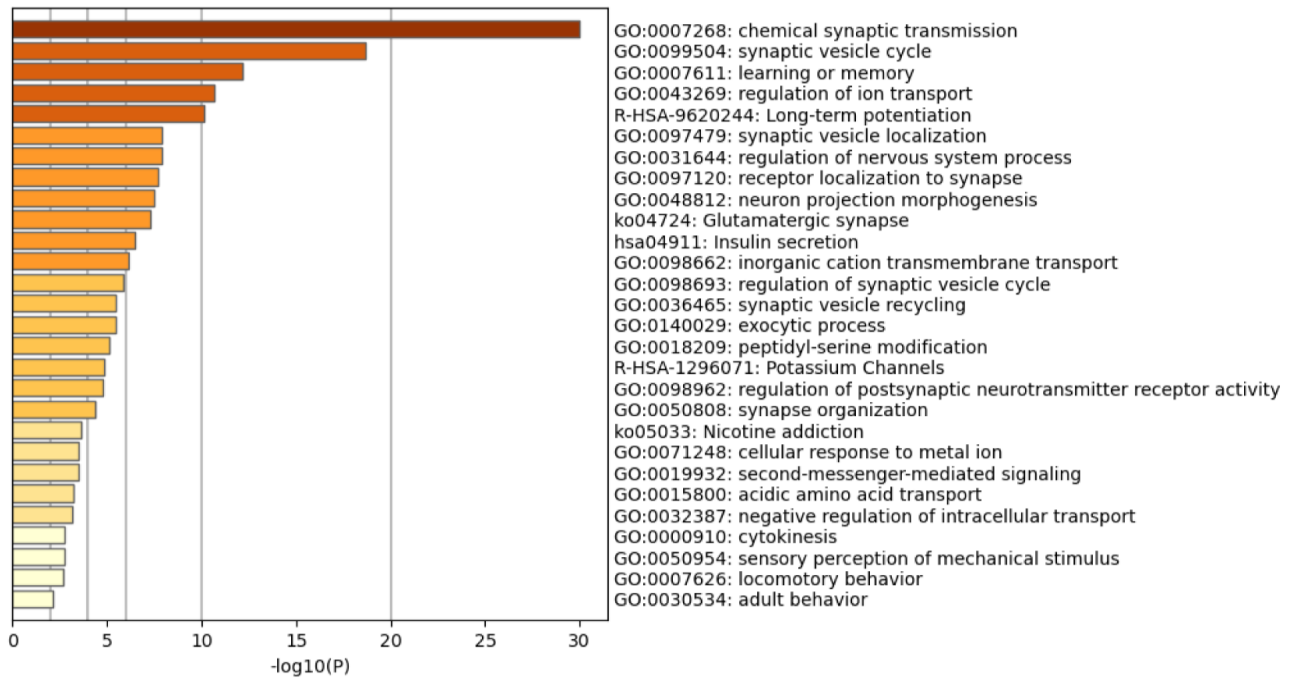

B

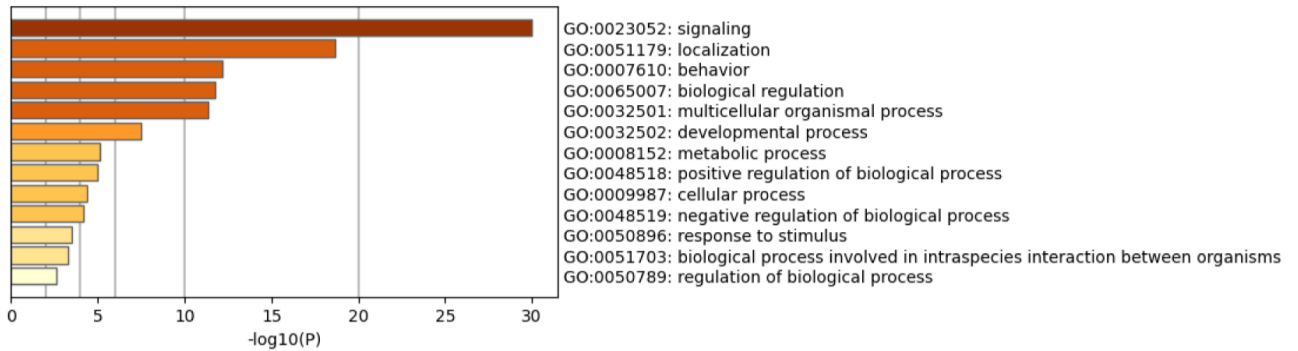

A

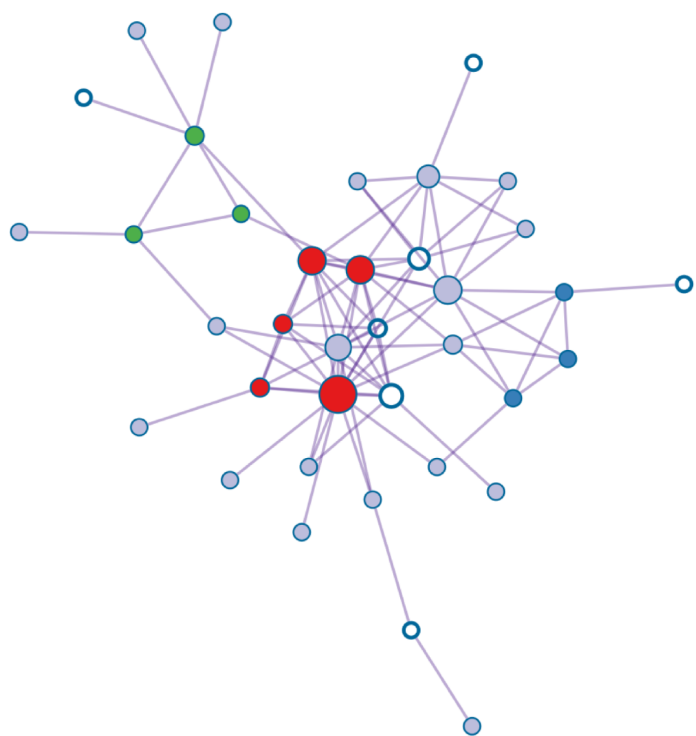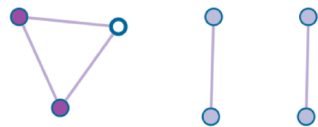

created by  
<http://metascape.org>

B

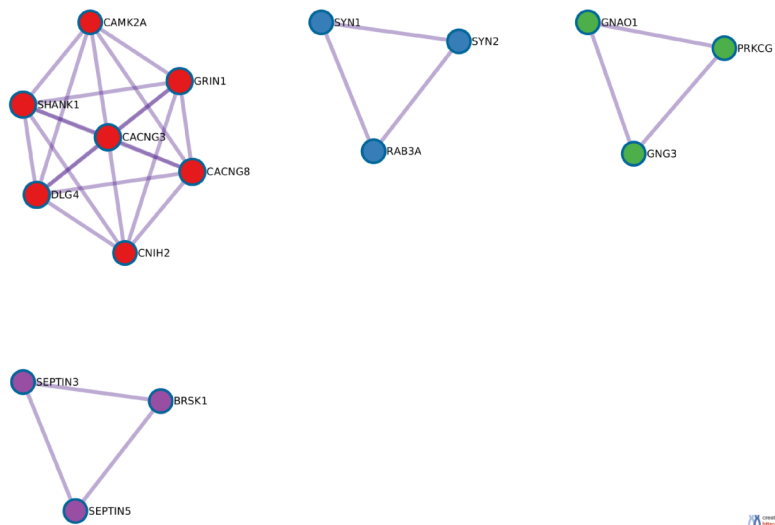

created by  
<http://metascape.org>

C

| GO         | Description                          | Log10(P) | Color | MCODE   | GO           | Description                                      | Log10(P) |
|------------|--------------------------------------|----------|-------|---------|--------------|--------------------------------------------------|----------|
| GO:0007268 | chemical synaptic transmission       | -28.0    | ■     | MCODE_1 | GO:0050804   | modulation of chemical synaptic transmission     | -12.7    |
| GO:0098916 | anterograde trans-synaptic signaling | -28.0    | ■     | MCODE_1 | GO:0099177   | regulation of trans-synaptic signaling           | -12.7    |
| GO:0099537 | trans-synaptic signaling             | -27.9    | ■     | MCODE_1 | GO:0099601   | regulation of neurotransmitter receptor activity | -12.0    |
|            |                                      |          | ■     | MCODE_2 | GO:0097091   | synaptic vesicle clustering                      | -10.0    |
|            |                                      |          | ■     | MCODE_2 | R-HSA-181429 | Serotonin Neurotransmitter Release Cycle         | -9.7     |
|            |                                      |          | ■     | MCODE_2 | R-HSA-212676 | Dopamine Neurotransmitter Release Cycle          | -9.3     |
|            |                                      |          | ■     | MCODE_3 | ko04727      | GABAergic synapse                                | -7.5     |
|            |                                      |          | ■     | MCODE_3 | hsa04727     | GABAergic synapse                                | -7.5     |
|            |                                      |          | ■     | MCODE_3 | ko05032      | Morphine addiction                               | -7.5     |

**Table S1. The TPM expression of NCS1 in 32 kinds of tumors from TCGA database.**

| <b>kinds</b> | <b>tumor</b> | <b>normal</b> |
|--------------|--------------|---------------|
| ACC          | 16.2         | 17.94         |
| BLCA         | 12.85        | 34.517        |
| BRCA         | 12.85        | 34.517        |
| CESC         | N/A          |               |
| CHOL         | 2.17         | 0.18          |
| COAD         | 8.39         | 59.738        |
| DLBC         | 2.17         | 0.18          |
| ESCA         | N/A          |               |
| GBM          | 28.249       | 222.12        |
| HNSC         | 27.04        | 12.505        |
| KICH         | 0.53         | 15.87         |
| KIRC         | 6.19         | 15.42         |
| KIRP         | N/A          |               |
| LAML         | 0.54         | 12.64         |
| LGG          | 35.465       | 222.12        |
| LIHC         | 1.53         | 0.735         |
| LUAD         | N/A          |               |
| LUSC         | 18.075       | 6.47          |
| MESO         | N/A          |               |
| OV           | 16.505       | 7.71          |
| PAAD         | 8.87         | 1.6           |
| PCPG         | 8.87         | 1.6           |
| PRAD         | 11.775       | 26.479        |
| READ         | 7.91         | 65.771        |
| SARC         | 7.91         | 65.771        |
| SKCM         | 18.47        | 13.32         |
| STAD         | N/A          |               |
| TGCT         | 8.18         | 3.56          |
| THCA         | 16.755       | 32.3          |
| THYM         | 9.407        | 0.18          |
| UCEC         | 11.875       | 42.541        |
| UCS          | N/A          |               |

**Table S2. The most similar genes to NCS1 from GEPIA 2.0.**

| Gene Symbol    | Gene ID            | PCC  | Gene Symbol   | Gene ID            | PCC  |
|----------------|--------------------|------|---------------|--------------------|------|
| PSD            | ENSG00000059915.16 | 0.81 | KCNJ4         | ENSG00000168135.4  | 0.71 |
| PACSIN1        | ENSG00000124507.10 | 0.81 | PHF24         | ENSG00000122733.12 | 0.71 |
| JPH3           | ENSG00000154118.12 | 0.81 | RP11-503P10.1 | ENSG00000272056.1  | 0.71 |
| KCNN1          | ENSG00000105642.15 | 0.8  | AC005330.2    | ENSG00000267372.2  | 0.71 |
| CAMK2A         | ENSG00000070808.15 | 0.8  | RIMS3         | ENSG00000117016.9  | 0.71 |
| KCNK4          | ENSG00000182450.12 | 0.8  | SYN2          | ENSG00000157152.16 | 0.71 |
| SNPH           | ENSG00000101298.13 | 0.8  | ADGRB2        | ENSG00000121753.12 | 0.71 |
| SEPT5          | ENSG00000184702.17 | 0.79 | GNAO1         | ENSG00000087258.13 | 0.71 |
| DLGAP3         | ENSG00000116544.11 | 0.78 | CAMKV         | ENSG00000164076.16 | 0.71 |
| BRSK1          | ENSG00000160469.16 | 0.77 | C1orf95       | ENSG00000203685.9  | 0.7  |
| CASKIN1        | ENSG00000167971.15 | 0.77 | CA11          | ENSG00000063180.8  | 0.7  |
| MAP1A          | ENSG00000166963.12 | 0.77 | 3-Sep         | ENSG00000100167.19 | 0.7  |
| IDS            | ENSG00000010404.17 | 0.77 | RP11-826N14.2 | ENSG00000248469.1  | 0.7  |
| RP11-1263C18.1 | ENSG00000273238.1  | 0.77 | SLC17A7       | ENSG00000104888.9  | 0.7  |
| CHN1           | ENSG00000128656.13 | 0.77 | FAM131A       | ENSG00000175182.13 | 0.7  |
| MAP3K10        | ENSG00000130758.7  | 0.77 | NRGN          | ENSG00000154146.12 | 0.7  |
| HSD11B1L       | ENSG00000167733.13 | 0.76 | JPH4          | ENSG00000092051.16 | 0.7  |
| CACNG3         | ENSG00000006116.3  | 0.76 | CALM3         | ENSG00000160014.16 | 0.7  |
| PDXP           | ENSG00000241360.1  | 0.76 | NAPB          | ENSG00000125814.17 | 0.7  |
| OLFM1          | ENSG00000130558.18 | 0.76 | CCK           | ENSG00000187094.11 | 0.7  |
| GNG3           | ENSG00000162188.5  | 0.75 | MGAT5B        | ENSG00000167889.12 | 0.7  |
| RP11-320H14.1  | ENSG00000260878.1  | 0.75 | FBXO41        | ENSG00000163013.11 | 0.69 |
| DLG4           | ENSG00000132535.18 | 0.75 | LLNLF-187D8.1 | ENSG00000277531.1  | 0.69 |
| KCNH3          | ENSG00000135519.6  | 0.75 | C11orf87      | ENSG00000185742.6  | 0.69 |
| PRKAR1B        | ENSG00000188191.14 | 0.74 | PIANP         | ENSG00000139200.13 | 0.69 |
| RP13-514E23.1  | ENSG00000261496.1  | 0.74 | SNX32         | ENSG00000172803.17 | 0.69 |
| PRKCG          | ENSG00000126583.10 | 0.74 | CABP1         | ENSG00000157782.9  | 0.69 |
| RAB3A          | ENSG00000105649.9  | 0.74 | HABP4         | ENSG00000130956.13 | 0.69 |
| CACNG8         | ENSG00000142408.2  | 0.74 | PNMAL2        | ENSG00000204851.6  | 0.69 |
| FXYP7          | ENSG00000221946.7  | 0.74 | CNIH2         | ENSG00000174871.10 | 0.69 |
| SLC25A23       | ENSG00000125648.14 | 0.74 | RP11-586D19.1 | ENSG00000249896.1  | 0.69 |
| SYN1           | ENSG00000008056.12 | 0.74 | ATL1          | ENSG00000198513.11 | 0.69 |
| PDZD4          | ENSG00000067840.12 | 0.74 | RP5-896L10.1  | ENSG00000232825.1  | 0.69 |
| DMTN           | ENSG00000158856.17 | 0.73 | TAGLN3        | ENSG00000144834.12 | 0.69 |
| GRIN1          | ENSG00000176884.14 | 0.73 | RNF208        | ENSG00000212864.3  | 0.69 |
| SULT4A1        | ENSG00000130540.13 | 0.73 | CEND1         | ENSG00000184524.5  | 0.68 |
| FBXL16         | ENSG00000127585.11 | 0.72 | MAGEE1        | ENSG00000198934.4  | 0.68 |
| KIF5A          | ENSG00000155980.11 | 0.72 | SNCB          | ENSG00000074317.10 | 0.68 |
| TPPP           | ENSG00000171368.11 | 0.72 | MIR124-2HG    | ENSG00000254377.5  | 0.68 |
| SHANK1         | ENSG00000161681.15 | 0.72 | RUNDC3A       | ENSG00000108309.12 | 0.68 |
| FRMPD4         | ENSG00000169933.12 | 0.72 | RP11-317N8.3  | ENSG00000257272.1  | 0.68 |
| RP11-416I2.1   | ENSG00000260328.1  | 0.72 | RP11-389G6.3  | ENSG00000261292.2  | 0.68 |
| C1orf216       | ENSG00000142686.7  | 0.72 | CPNE6         | ENSG00000100884.9  | 0.68 |
| NECAB1         | ENSG00000123119.11 | 0.72 | LINC00950     | ENSG00000281205.1  | 0.68 |
| DLG2           | ENSG00000150672.16 | 0.72 | SERP2         | ENSG00000151778.10 | 0.68 |

|           |                    |      |              |                    |      |
|-----------|--------------------|------|--------------|--------------------|------|
| RAPGEF4   | ENSG00000091428.17 | 0.72 | GABRA5       | ENSG00000186297.11 | 0.68 |
| APBA1     | ENSG00000107282.7  | 0.72 | RP11-713C5.1 | ENSG00000265579.1  | 0.68 |
| NPTXR     | ENSG00000221890.2  | 0.72 | RP11-43A14.2 | ENSG00000282375.1  | 0.68 |
| CELF5     | ENSG00000161082.12 | 0.71 | CAMK1G       | ENSG00000008118.9  | 0.68 |
| THSD4-AS1 | ENSG00000259964.6  | 0.71 | CTD-2228A4.1 | ENSG00000271892.1  | 0.68 |

**PCC:** Pearson correlation coefficient
